# Supplementary material for: miR-155 Regulates IL-10-Producing CD24hiCD27+ B Cells and Impairs Their Function in Patients with Crohn’s Disease
Source: PubMed Central journal article supplement (PMC5540954; doi:10.3389/fimmu.2017.00914), 2017-08-03
Supplement: data_sheet_1.pdf [file data_sheet_1.pdf]

1 **MiR-155 regulates IL-10-producing CD24<sup>hi</sup>CD27<sup>+</sup> B cells and**  
2 **impairs their function in patients with Crohn's disease**

3 Yingxia Zheng,<sup>1,2</sup> Wensong Ge,<sup>3</sup> Yanhui Ma,<sup>1</sup> Guohua Xie,<sup>1</sup> Weiwei Wang,<sup>1</sup> Li  
4 Han,<sup>1</sup> Bingxian Bian,<sup>1</sup> Li Li,<sup>1</sup> Lisong Shen<sup>1,\*</sup>

5  
6  
7 **Supplementary information**

8 *miRNA Microarray*

9 Human CD19<sup>+</sup> B cells were isolated and were stimulated with CpG  
10 oligonucleotides for 48 h. Total RNA was quantified by the NanoDrop ND-2000  
11 (Thermo Scientific) and the RNA integrity was assessed using Agilent Bioanalyzer  
12 2100 (Agilent Technologies). The sample labeling, microarray hybridization and  
13 washing were performed based on the manufacturer's standard protocols. Briefly,  
14 total RNA were dephosphorylated, denatured and then labeled with Cyanine-3-CTP.  
15 After purification the labeled RNAs were hybridized onto the microarray. After  
16 washing, the arrays were scanned with the Agilent Scanner G2505C (Agilent  
17 Technologies). Feature Extraction software (version 10.7.1.1, Agilent Technologies)  
18 was used to analyze array images to get data.

19  
20 *Cell viability*

21 Isolated B cells were electroporated with control or miR-155 mimic and miR-155  
22 stimulated with 100 nM CPG and cultured for another 48 h. The viability of the cells  
23 was analyzed by CellTiter-Glo luminescent assay (Promega, Madison, WI);  
24 the luminescence values were measured with microplate computer software (Bio-Rad  
25 Laboratories).

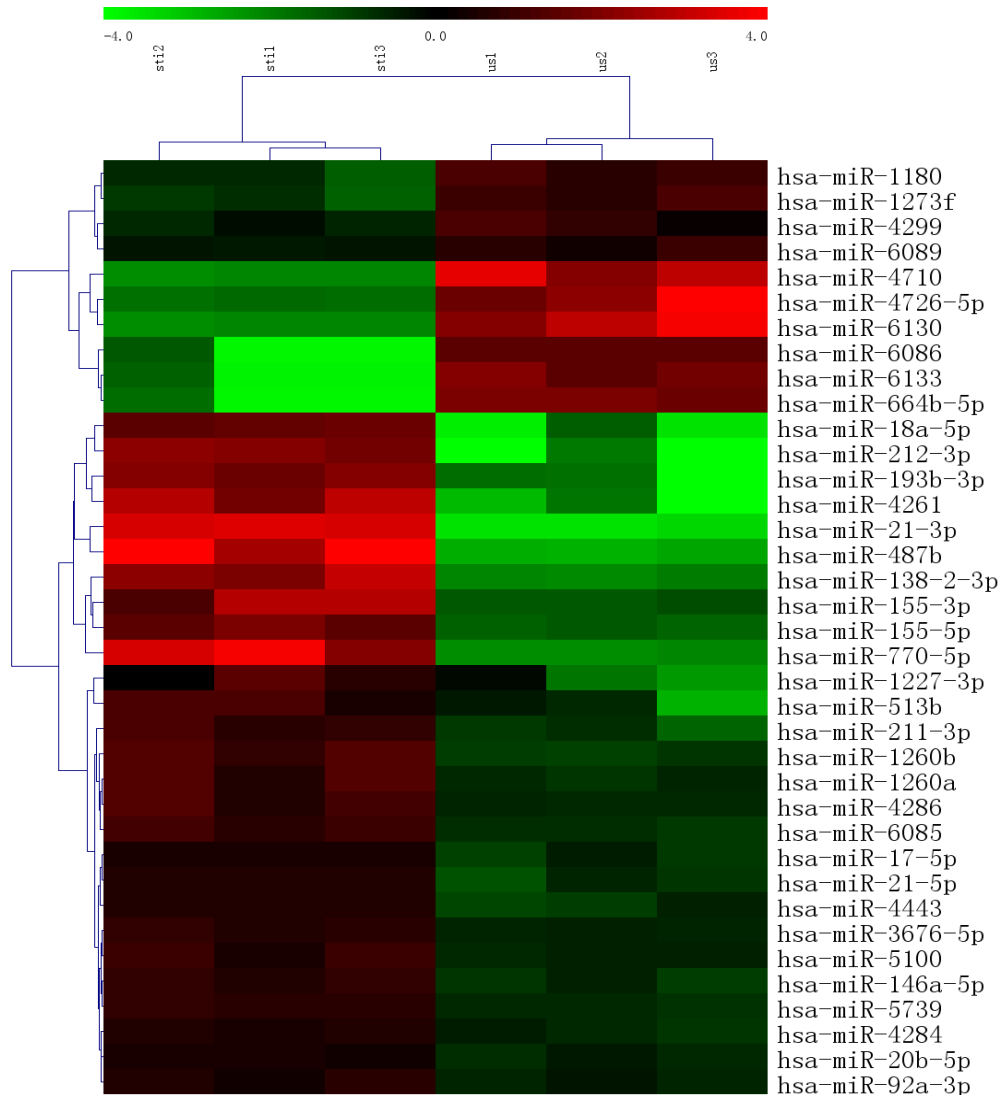

26

27 Supplementary figure 1: Heat map and unsupervised hierarchical clustering of  
 28 miRNAs in human CD19<sup>+</sup> B cells stimulated with or without 100nM CpG  
 29 oligonucleotides for 48 h. The microRNA arrays were scanned with the Agilent  
 30 Scanner G2505C. Differentially expressed miRNAs were then identified through fold  
 31 change. Hierarchical Clustering was performed to show the distinguishable miRNAs  
 32 expression pattern among samples.

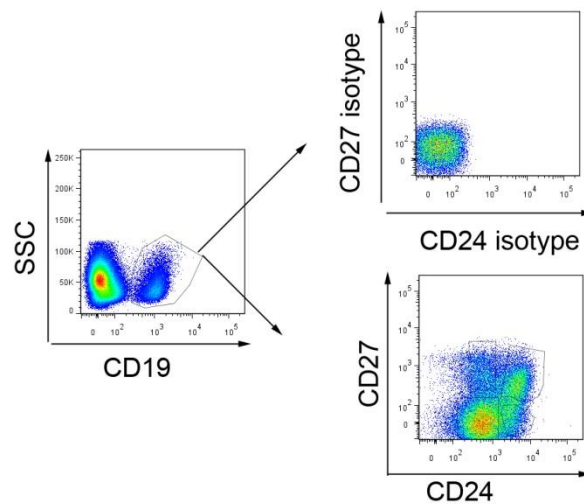

33

34 Supplementary figure 2: Flowcytometric gating strategy for B cell subsets in a  
 35 representative healthy control. B cells defined as CD19<sup>+</sup> lymphocytes were further  
 36 classified into four subsets (CD24<sup>hi</sup>CD27<sup>+</sup>; CD24<sup>lo</sup>CD27<sup>+</sup>; CD24<sup>hi</sup>CD27<sup>-</sup>;  
 37 CD24<sup>lo</sup>CD27<sup>-</sup>) according to the CD24 and CD27 markers.

38

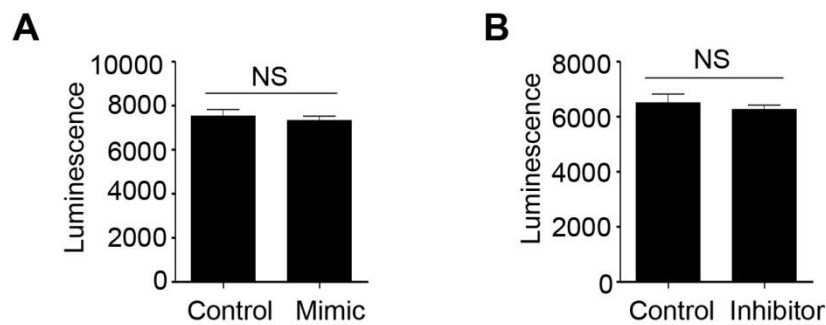

39

40 Supplementary Figure 3: (A) Isolated CD19<sup>+</sup> B cells were electroporated with control  
 41 or miR-155 mimic; then, the cells were cultured in a 96-well microplate (2 x 10<sup>5</sup> cells  
 42 per well), stimulated with 100 nM CPG and cultured for another 48 h. The viability of  
 43 the cells was then analyzed. (B) FACS was used to sort CD24<sup>hi</sup>CD27<sup>+</sup> B cells, which  
 44 were electroporated with control or miR-155 inhibitor; then, the cells were cultured in  
 45 a 96-well microplate (2 x 10<sup>5</sup> cells per well), stimulated with 100 nM CPG and  
 46 cultured for another 48 h. The viability of the cells was then analyzed. NS: no  
 47 significant difference.

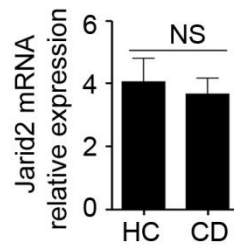

48

49 Supplementary Figure 4: CD19<sup>+</sup>B cells isolated from HCs and CD patients; Jarid2

50 expression levels were measured by Q-PCR. NS: no significant difference.

51
